# Supplementary material for: “De novo replication repair deficient glioblastoma, IDH-wildtype” is a distinct glioblastoma subtype in adults that may benefit from immune checkpoint blockade
Source: Springer Nature journal article supplement (doi:10.1007/s00401-023-02654-1), 2023-12-11
Supplement: MOESM1 [file 401_2023_2654_MOESM1_ESM.pdf]

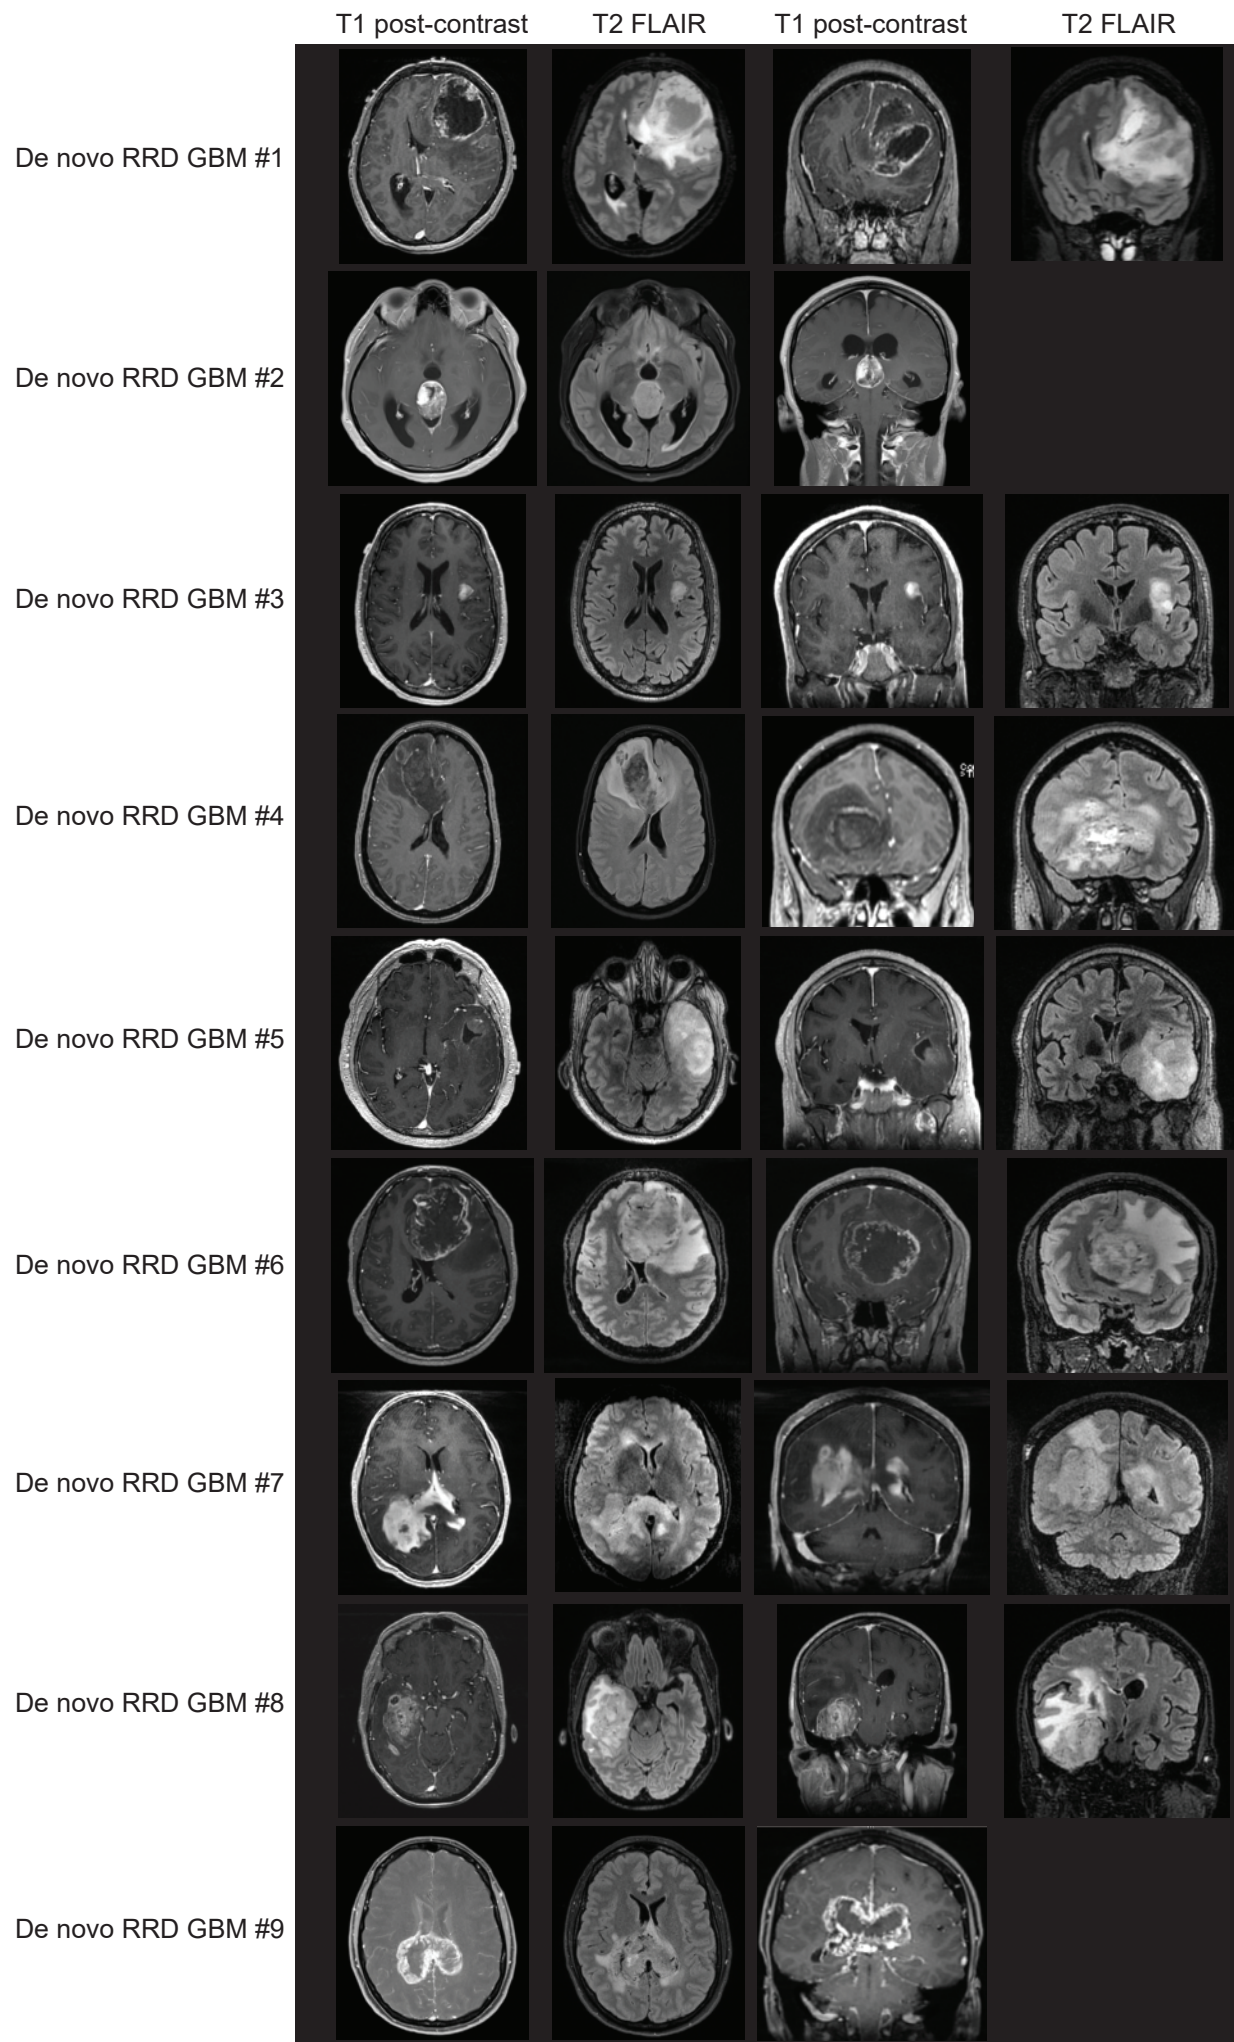

**Supplementary Figure 1.** Pre-operative imaging features of “De novo replication repair deficient glioblastoma, IDH-wildtype”.

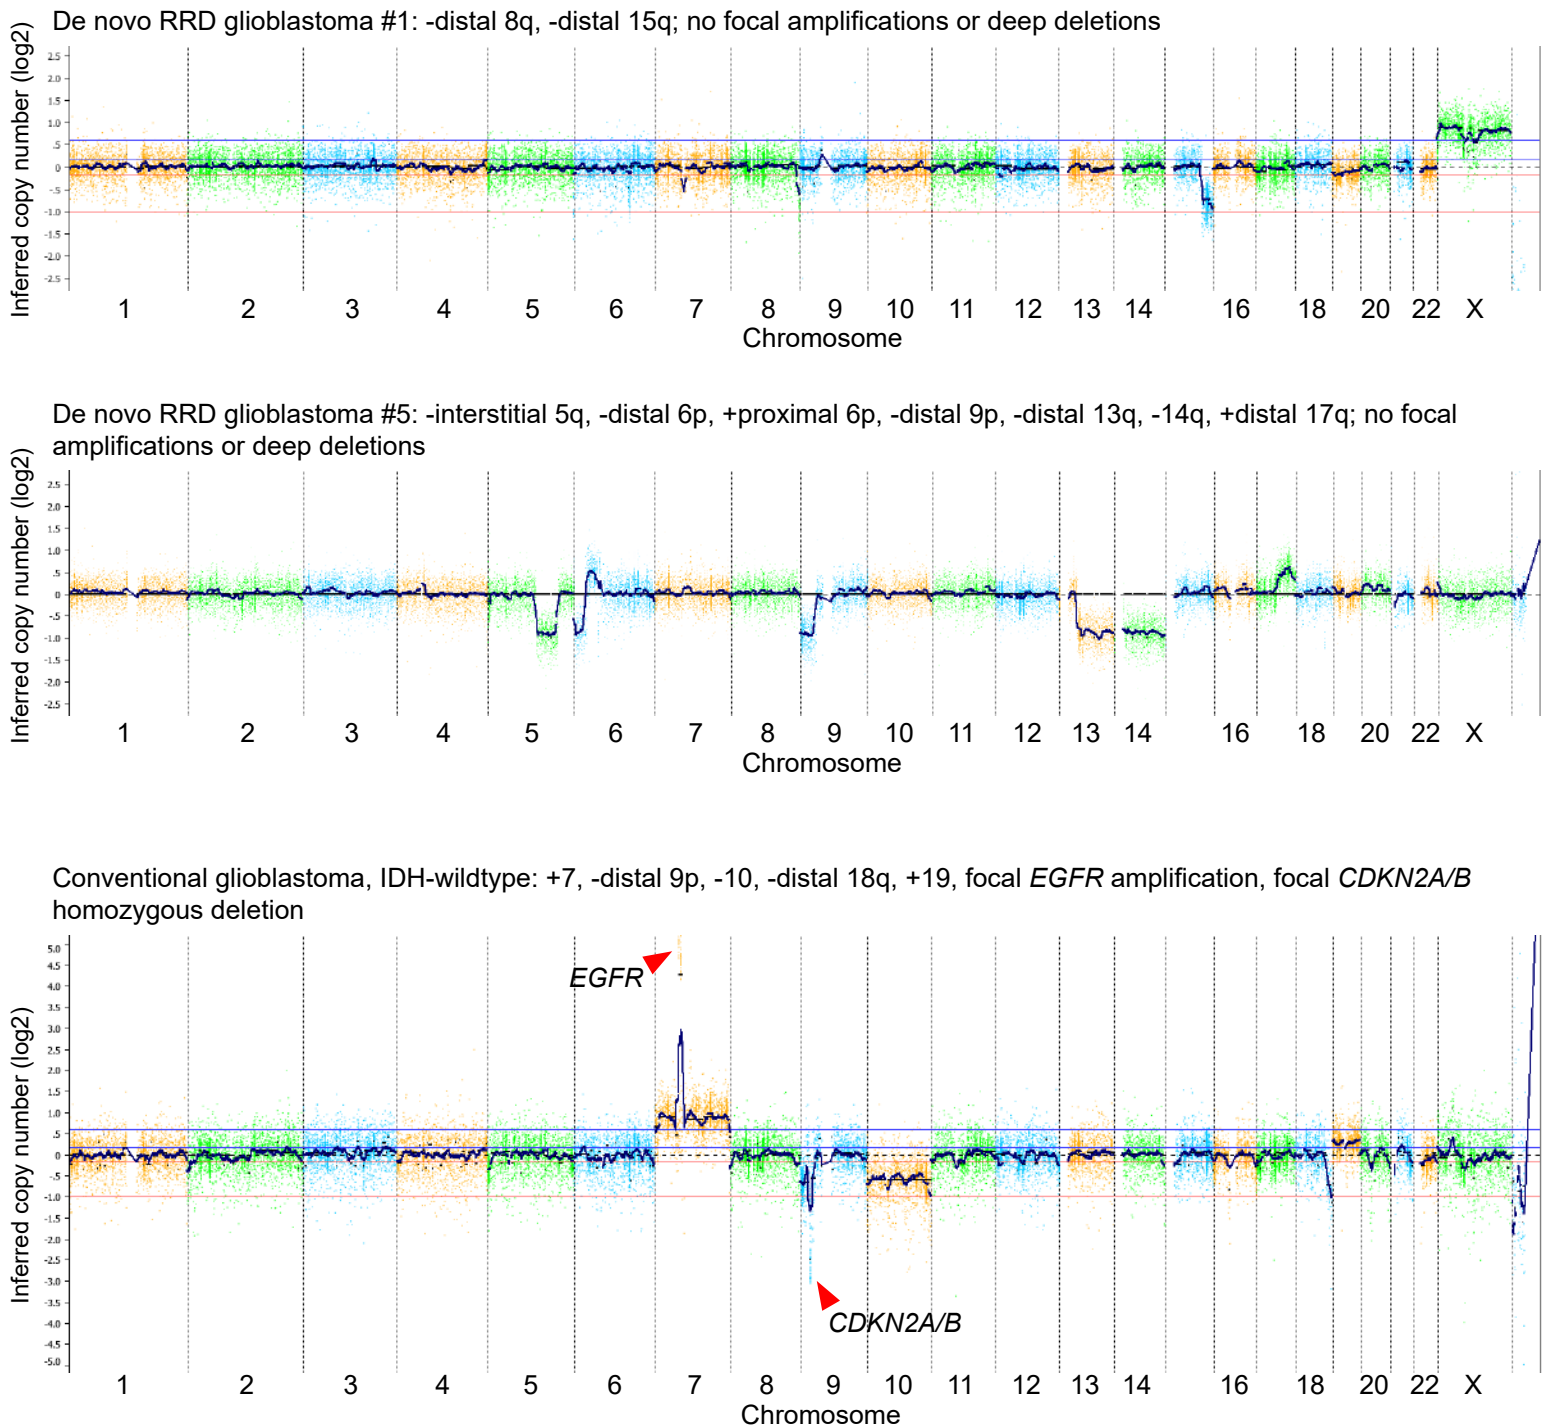

**Supplementary Figure 2.** Chromosomal copy number plots for two “De novo replication repair deficient glioblastoma, IDH-wildtype” demonstrating a small number of chromosomal gains and losses per tumor, but an absence of focal amplifications and deep deletions and an absence of combined trisomy 7 plus monosomy 10. A prototypical chromosomal copy number plot for a conventional glioblastoma, IDH-wildtype is shown for comparison that has focal high-level *EGFR* amplification, focal *CDKN2A/B* homozygous deletion, and combined trisomy 7 plus monosomy 10.



Conventional glioblastoma, IDH-wildtype, with heterozygous *MSH6* frameshift mutation affecting one of two alleles in tumor cells and intact MSH6 protein expression by immunohistochemistry, microsatellite stable (instability at <2% of the 86 evaluated microsatellites), low somatic mutation burden (<5 somatic mutations per Mb), absence of giant cell morphologic features, chromosomal copy number profile = trisomy chromosome 7 + monosomy chromosome 10, genetic alterations = focal *EGFR* amplification, focal *CDKN2A/B* homozygous deletion, *TERT* promoter c.-124C>T mutation, DNA methylation profile = Glioblastoma, IDH-wildtype, mesenchymal type with calibrated score of 0.876 by version 12.5 of DKFZ Molecular Neuropathology classifier

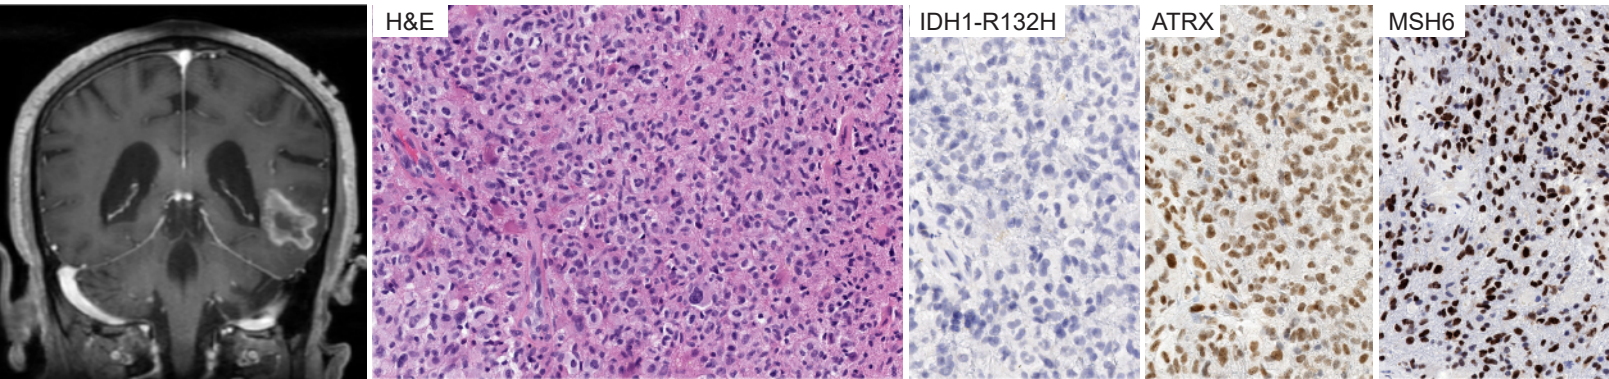

| PATHOGENIC AND LIKELY PATHOGENIC ALTERATIONS |                |                |                |                         |
|----------------------------------------------|----------------|----------------|----------------|-------------------------|
| VARIANT                                      | TRANSCRIPT ID  | CLASSIFICATION | READS          | MUTANT ALLELE FREQUENCY |
| CDKN2A, CDKN2B homozygous deletion           | all            | Pathogenic     | N/A            | N/A                     |
| EGFR p.S229C                                 | NM_005228.3    | Pathogenic     | 1588           | 88%                     |
| EGFR high level amplification                | NM_005228      | Pathogenic     | ~10,000 (>15x) | N/A                     |
| MSH6 p.Y397fs                                | NM_000179.2    | Pathogenic     | 1344           | 48%                     |
| PTEN p.N48fs                                 | NM_000314.4    | Pathogenic     | 368            | 86%                     |
| STAG2 p.R259*                                | NM_001042749.1 | Pathogenic     | 278            | 95%                     |
| TERT c.-124C>T                               | NM_198253.2    | Pathogenic     | 1311           | 52%                     |
| TP53 p.C242R                                 | NM_000546.5    | Pathogenic     | 586            | 46%                     |
| Trisomy 7, Monosomy 10                       | N/A            | Pathogenic     | N/A            | N/A                     |

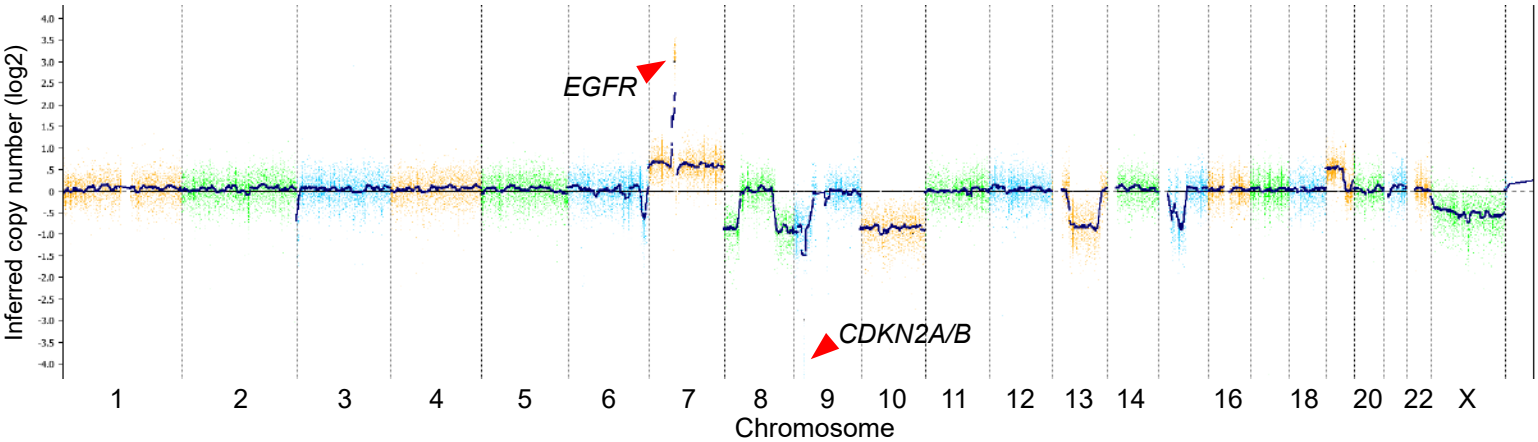

**Supplementary Figure 3.** Rare primary treatment-naïve conventional IDH-wildtype glioblastomas in the cerebral hemispheres of adults contain heterozygous inactivating mutations in a canonical mismatch repair gene affecting one of two alleles and have intact expression of the affected mismatch repair protein in tumor cells by immunohistochemistry, along with absence of microsatellite instability and absence of somatic hypermutation. Two of the 450 conventional primary treatment-naïve IDH-wildtype glioblastomas in this patient cohort (<1%) contained heterozygous *MSH6* frameshift mutations affecting one of two alleles in tumor cells. Both demonstrated typical glioblastoma histology with absence of giant cell morphology and had intact MSH6 protein expression by immunohistochemistry, were microsatellite stable, had low somatic mutation burden, had the combination of trisomy chromosome 7 + monosomy chromosome 10, contained genetic alterations typical of conventional IDH-wildtype glioblastoma (*TERT* promoter mutation, *CDKN2A/B* homozygous deletion, *EGFR* amplification), and had DNA methylation profiles that aligned with reference methylation classes of adult-type glioblastoma, IDH-wildtype with high calibrated scores.
